# Supplementary material
Source: publisher site journal article supplement (http://kjim.org/upload/media/kjim-2023-347-Supplementary-Table-3.pdf)
Supplement: Supplementary file 1 [file kjim-2023-347-Supplementary-Table-3.pdf]

**Supplementary Table 3. Optimal cut-off values of the risk factors for progression to critical illness in patients with hospital-acquired COVID-19**

| Variable                                  | Cut-off value | AUROC (95% CI)   | Specificity | Sensitivity |
|-------------------------------------------|---------------|------------------|-------------|-------------|
| Sequential organ failure assessment score | 4.5           | 0.79 (0.71–0.88) | 0.66        | 0.78        |
| Clinical frailty scale                    | 6.5           | 0.81 (0.74–0.88) | 0.64        | 0.81        |

COVID-19, coronavirus disease 2019; AUROC, area under receiver operating characteristic curve; CI, confidence interval.
